# Supplementary material for: Relevant π-hole tetrel bonding interactions in ethyl 2-triazolyl-2-oxoacetate derivatives: Hirshfeld surface analysis and DFT calculations
Source: Royal Society of Chemistry journal article supplement (doi:10.1039/d0ce00335b), 2020-01-01
Supplement: d0ce00335b1.pdf [file d0ce00335b1.pdf]

## Electronic Supporting Information File

### For manuscript

#### Relevant $\pi$ -hole tetrel bonding interactions in ethyl 2-triazolyl-2-oxo-acetate derivatives: Hirshfeld surface analysis and DFT calculations

Muhammad Naeem Ahmed,<sup>a\*</sup> Khawaja Ansar Yasin<sup>a</sup>, Shahid Aziz<sup>b</sup>, Saba Urooge Khan<sup>c</sup>, Muhammad Nawaz Tahir,<sup>d</sup> Diego Mauricio Gil<sup>e</sup> and Antonio Frontera<sup>f\*</sup>

<sup>a</sup>*Department of Chemistry, The University of Azad Jammu and Kashmir, Muzaffarabad, 13100 Pakistan*

<sup>b</sup>*Department of Chemistry, Mirpur University of Science and Technology, Mirpur, Azad Kashmir*

<sup>c</sup>*Department of Polymer Engineering and Technology University of The Punjab*

<sup>d</sup>*Department of Physics, University of Sargodha, Sargodha, Pakistan*

<sup>e</sup>*INBIOFAL (CONICET - UNT), Instituto de Química Orgánica - Cátedra de Química Orgánica I, Facultad de Bioquímica, Química y Farmacia, Universidad Nacional de Tucumán, Ayacucho 471 (T4000INI), San Miguel de Tucumán - Tucumán - Argentina*

<sup>f</sup>*Department de Química, Universitat de les Illes Balears, Crta. De Valldemossa km 7.5, 07122 Palma de Mallorca (Balears), Spain*

#### Table of contents:

**Figures 1 and 2**

**Page 2**

*Compound 1*

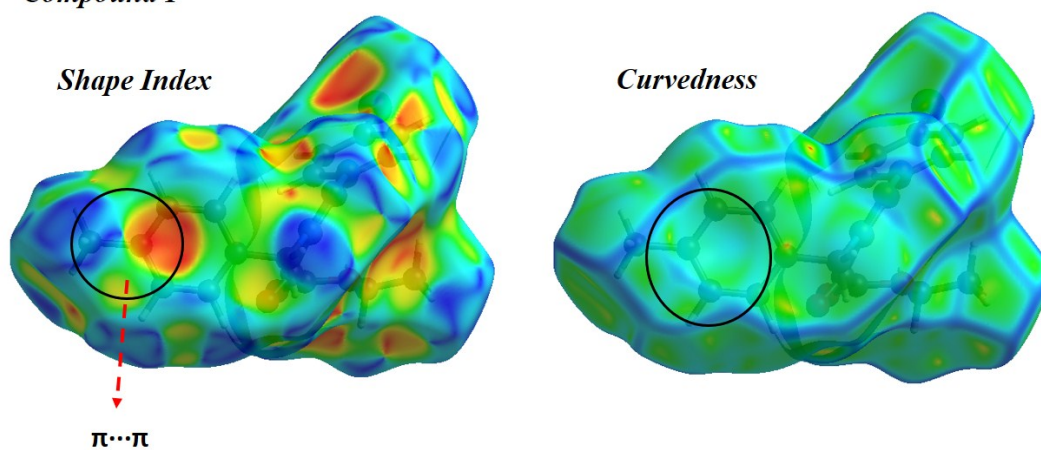

Figure S1. Shape index (left) and curvedness (right) of compound 1.

*Compound 2*

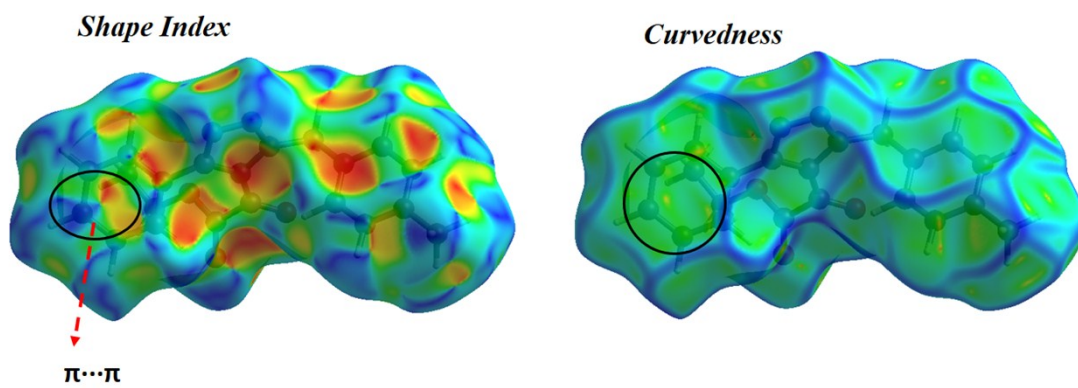

Figure S2. Shape index (left) and curvedness (right) of compound 2.
